# Supplementary material for: Quantifying the effects of environmental factors on wildfire burned area in the south central US using integrated machine learning techniques
Source: Copernicus journal article supplement (doi:10.5194/acp-20-11065-2020), 2020-09-28
Supplement: Supplementary file 1 [file acp-20-11065-2020-supplement.pdf]

Supplement of Atmos. Chem. Phys., 20, 11065–11087, 2020  
<https://doi.org/10.5194/acp-20-11065-2020-supplement>  
© Author(s) 2020. This work is distributed under  
the Creative Commons Attribution 4.0 License.

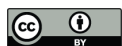

*Supplement of*

## **Quantifying the effects of environmental factors on wildfire burned area in the south central US using integrated machine learning techniques**

**Sally S.-C. Wang and Yuxuan Wang**

*Correspondence to:* Yuxuan Wang (ywang246@central.uh.edu)

The copyright of individual parts of the supplement might differ from the CC BY 4.0 License.

# Supplement

**Table S1.** Studies using statistical methods to estimate burned area

| Region                       | period                  | Method               | Spatial domain               | Spatial scale<br>(estimated;<br>km <sup>2</sup> ) | Temporal scale | R <sup>2</sup> | Reference                      |
|------------------------------|-------------------------|----------------------|------------------------------|---------------------------------------------------|----------------|----------------|--------------------------------|
| Canada                       | 1959-1997               | MLR                  | Ecoregions                   | 466x466~1123x1123                                 | Monthly        | 36-64%         | Flannigan et al. (2005)        |
| Portugal                     | 1980-2004               | MLR                  | Portuguese districts         | 25x25~100x100                                     | Monthly        | 43-80%         | Carvalho et al. (2008)         |
| Alaska and Canada            | 1960-2002               | MARS                 | Alaska and western Canada    | 100x100~235x235                                   | Annually       | 82%            | Balshi et al. (2009)           |
| EU-Mediterranean             |                         | MLR                  | European Mediterranean basin | 1400x1400                                         | Monthly        | 87%            | Camia and Amatulli (2009)*     |
| Western US                   | 1916-2003               | MLR <sup>1</sup>     | Ecoregions                   | 600x600~1000x1000                                 | Annually       | 25-57%         | Listtell et al. (2009)         |
| Western US                   | 1980-2004               | MLR                  | Ecoregions                   | 600x600~1000x1000                                 | Annually       | 37-57%         | Spracklen et al. (2009)        |
| Western US                   | 1972-1988;<br>1989-2005 | MLR, RF <sup>2</sup> | NUTS3 <sup>4</sup>           | 600x600~1000x1000                                 | Annually       | 73%; 83%       | Westerling et al. (2011)       |
| EU-Mediterranean             | 1985-2004               | MLR                  | Countries                    | 300x300~1000x1000                                 | Monthly        | 39-69%         | Amatulli et al. (2013)         |
| EU-Mediterranean             | 1985-2004               | RF                   | Countries                    |                                                   | Monthly        | 33-72%         | Amatulli et al. (2013)         |
| EU-Mediterranean             | 1985-2004               | MARS <sup>3</sup>    | Countries                    |                                                   | Monthly        | 43-77%         | Amatulli et al. (2013)         |
| Spain                        | 1990-2008               | MARS                 | Phytoclimatic zones          | 25x25~100x100                                     | Monthly        | 1-37%          | Bedia et al. (2013)            |
| Western US                   | 1916-2004               | MLR                  | Ecoregions                   | 600x600~1000x1000                                 | Annually       | 25-60%         | Yue et al. (2013)              |
| Western US                   | 1916-2004               | Parameterization     | Ecoregions                   |                                                   | Annually       | 1-69%          | Yue et al. (2013)              |
| North-eastern Spain          | 1983-2012               | MLR                  | Catalonia                    | 300x300                                           | Annually       | 33%            | Marcos et al. (2015)           |
| Iberian Peninsula            | 1981-2005               | MLR                  | Pyro-regions                 | 200x200~700x700                                   | Monthly        | 52-72%         | Sousa et al. (2015)            |
| EU-Mediterranean             | 1985-2011               | MLR                  | EUMED <sup>5</sup>           | 2000x2000                                         | Annually       | 60%            | Urbieta et al. (2015)          |
| Pacific western coast of USA | 1985-2011               | MLR                  | Oregon and California        | 1000x1000                                         | Annually       | 37%            | Urbieta et al. (2015)          |
| British Columbia, Canada     | 1961-2010               | MLR                  | Southern Cordillera          | 1400x1400                                         | Annually       | 55%            | Kirchmeier-Young et al. (2018) |

|                                    |           |                                                          |                                                           |               |          |                                          |                     |
|------------------------------------|-----------|----------------------------------------------------------|-----------------------------------------------------------|---------------|----------|------------------------------------------|---------------------|
| Catalonia,<br>Iberian<br>Peninsula | 1982-2015 | MLR                                                      | Fire regime<br>zones                                      | 80x80~150x150 | Annually | 57-91%                                   | Duane et al. (2019) |
| South-Central<br>US                | 2002-2015 | Integration of<br>RF, logistic<br>regression, and<br>QRF | Eastern Texas,<br>Oklahoma,<br>Louisiana, and<br>Arkansas | 700x700       | Monthly  | 50% (winter-<br>spring); 79%<br>(summer) | This study          |

5 <sup>1</sup> MLR: Multiple Linear Regression; <sup>2</sup> RF: Random forest; <sup>3</sup> MARS: Multivariate adaptive regression Splines; <sup>4</sup> NUTS3: Nomenclature of Territorial Units at the third level <sup>5</sup> EUMED: burned area summation over Portugal, Spain, South France, Italy and Greece

\*: focus on only large fires

10

**Table S2.** Comparison of MAE and skewness between the RF model and the developed model

| <b>Metrics</b>                    | <b>Model developed in this study</b> | <b>MLR</b>          | <b>RF alone</b>     | <b>XGboost</b>      |
|-----------------------------------|--------------------------------------|---------------------|---------------------|---------------------|
| <b>MAE (winter-spring)</b>        | 1.13                                 | 1.44                | 1.34                | 1.26                |
| <b>Skewness (winter-spring) §</b> | 0.70 (percentiles)                   | 37.40 (burned area) | 37.40 (burned area) | 37.40 (burned area) |
| <b>MAE (summer)</b>               | 0.57                                 | 0.76                | 0.70                | 0.67                |
| <b>Skewness (summer) §</b>        | 0.96 (percentiles)                   | 33.83 (burned area) | 33.83 (burned area) | 33.83 (burned area) |

§: Skewness: The calculation of the skewness is described below in the section of calculation of skewness.

15 **Table S3.** The selected XGboost hyperparameters for the winter-spring and summer fire seasons

|                      | <b>eta</b> | <b>Max_depth</b> | <b>gamma</b> | <b>subsample</b> | <b>Colsample_bytree</b> | <b>Min_child_weight</b> |
|----------------------|------------|------------------|--------------|------------------|-------------------------|-------------------------|
| <b>Winter-spring</b> | 0.01       | 10               | 3            | 0.75             | 0.7                     | 1                       |
| <b>Summer</b>        | 0.05       | 8                | 3            | 1                | 0.6                     | 1                       |

**Table S4.** Model performance at grid level for the selected years

| Year/Fire season                               | Including misclassified grids |                         |                        | Excluding misclassified grids |                         |                        |
|------------------------------------------------|-------------------------------|-------------------------|------------------------|-------------------------------|-------------------------|------------------------|
|                                                | R <sup>2</sup>                | RMSE (km <sup>2</sup> ) | MAE (km <sup>2</sup> ) | R <sup>2</sup>                | RMSE (km <sup>2</sup> ) | MAE (km <sup>2</sup> ) |
| <b>2011 (combine winter-spring and summer)</b> | 0.30                          | 11.04                   | 3.38                   | 0.42                          | 21.06                   | 5.25                   |
| <b>2014 (winter-spring)</b>                    | 0.30                          | 5.19                    | 1.05                   | 0.51                          | 5.87                    | 0.77                   |
| <b>2008 (summer)</b>                           | 0.42                          | 1.58                    | 0.38                   | 0.66                          | 1.75                    | 0.43                   |

**Table S5.** Model performance at grid level for each year

| Statistics                                           | Year |      |      |      |       |      |       |       |       |       |      |      |      |      |
|------------------------------------------------------|------|------|------|------|-------|------|-------|-------|-------|-------|------|------|------|------|
|                                                      | 2002 | 2003 | 2004 | 2005 | 2006  | 2007 | 2008  | 2009  | 2010  | 2011  | 2012 | 2013 | 2014 | 2015 |
| <b>Winter-spring (excluding misclassified grids)</b> |      |      |      |      |       |      |       |       |       |       |      |      |      |      |
| R <sup>2</sup>                                       | 0.70 | 0.76 | 0.77 | 0.64 | 0.38  | 0.52 | 0.51  | 0.38  | 0.54  | 0.36  | 0.56 | 0.55 | 0.41 | 0.61 |
| MAE (km <sup>2</sup> )                               | 0.20 | 0.46 | 0.34 | 0.34 | 5.63  | 0.37 | 2.10  | 3.12  | 0.38  | 3.17  | 0.32 | 0.27 | 0.83 | 0.34 |
| RMSE (km <sup>2</sup> )                              | 2.02 | 2.30 | 1.50 | 1.91 | 14.61 | 1.64 | 11.18 | 14.21 | 1.81  | 23.34 | 2.48 | 0.91 | 6.04 | 1.92 |
| <b>Summer (excluding misclassified grids)</b>        |      |      |      |      |       |      |       |       |       |       |      |      |      |      |
| R <sup>2</sup>                                       | 0.40 | 0.46 | 0.60 | 0.62 | 0.59  | 0.31 | 0.59  | 0.43  | 0.47  | 0.40  | 0.49 | 0.56 | 0.37 | 0.41 |
| MAE (km <sup>2</sup> )                               | 0.08 | 0.17 | 0.09 | 0.52 | 0.93  | 0.02 | 0.42  | 0.58  | 0.33  | 3.71  | 1.20 | 0.32 | 0.15 | 0.68 |
| RMSE (km <sup>2</sup> )                              | 0.32 | 1.88 | 0.92 | 2.08 | 2.48  | 0.09 | 1.42  | 6.37  | 0.95  | 12.08 | 9.23 | 1.81 | 1.66 | 4.35 |
| <b>Winter-spring (including misclassified grids)</b> |      |      |      |      |       |      |       |       |       |       |      |      |      |      |
| R <sup>2</sup>                                       | 0.40 | 0.52 | 0.49 | 0.39 | 0.35  | 0.27 | 0.28  | 0.29  | 0.31  | 0.23  | 0.35 | 0.28 | 0.30 | 0.40 |
| MAE (km <sup>2</sup> )                               | 0.18 | 0.35 | 0.26 | 0.31 | 4.84  | 0.33 | 1.92  | 2.83  | 0.311 | 2.78  | 0.25 | 0.24 | 1.05 | 0.35 |
| RMSE (km <sup>2</sup> )                              | 1.70 | 1.95 | 1.23 | 1.78 | 13.42 | 1.59 | 10.26 | 13.24 | 1.55  | 21.12 | 2.10 | 0.81 | 5.19 | 3.21 |
| <b>Summer (including misclassified grids)</b>        |      |      |      |      |       |      |       |       |       |       |      |      |      |      |
| R <sup>2</sup>                                       | 0.28 | 0.10 | 0.28 | 0.33 | 0.45  | 0.10 | 0.42  | 0.29  | 0.31  | 0.39  | 0.32 | 0.40 | 0.20 | 0.26 |

|                            |      |      |      |      |      |      |      |      |      |       |      |      |      |      |
|----------------------------|------|------|------|------|------|------|------|------|------|-------|------|------|------|------|
| MAE<br>(km <sup>2</sup> )  | 0.09 | 0.18 | 0.11 | 0.42 | 0.76 | 0.05 | 0.38 | 0.48 | 0.31 | 3.09  | 1.08 | 0.27 | 0.19 | 0.57 |
| RMSE<br>(km <sup>2</sup> ) | 0.67 | 1.75 | 0.95 | 1.79 | 2.20 | 0.25 | 1.58 | 5.50 | 0.96 | 10.85 | 8.35 | 1.63 | 2.06 | 3.85 |

25

**Table S6.** The ratio of %IncMSE at variable ranked as X percentile ( $Y^{\text{th}}$ ) to the %IncMSE at variable ranked as  $(Y+1)^{\text{th}}$  for the three selected percentiles

|                      | <b>25<sup>th</sup> percentile (Y=14)</b> | <b>50<sup>th</sup> percentile (Y=29)</b> | <b>75<sup>th</sup> percentile (Y=43)</b> |
|----------------------|------------------------------------------|------------------------------------------|------------------------------------------|
| <b>Spring-winter</b> | 1.21                                     | 0.88                                     | 1.00                                     |
| <b>Summer</b>        | 1.06                                     | 1.01                                     | 1.00                                     |

30 **Table S7.** Comparison of accuracy, AUC, F-1 score, MAE, RMSE, and MAE of large burned area between the model with the chosen set of predictors and the model with the predictors that have lower degrees of collinearity ( $r < |0.5|$ )

| <b>Model</b>                                                     | <b>Model with the chosen set of variables</b> | <b>Model with variables that have lower degrees of collinearity</b> |
|------------------------------------------------------------------|-----------------------------------------------|---------------------------------------------------------------------|
| <b>Winter-Spring</b>                                             |                                               |                                                                     |
| Number of predictor variables                                    | 58                                            | 33                                                                  |
| Accuracy (winter-spring)                                         | 0.74                                          | 0.71                                                                |
| AUC (winter-spring)                                              | 0.82                                          | 0.78                                                                |
| F-1 (winter-spring)                                              | 0.79                                          | 0.77                                                                |
| MAE (log(area); winter-spring)                                   | 1.37                                          | 1.43                                                                |
| RMSE (log(area); winter-spring)                                  | 2.03                                          | 2.06                                                                |
| MAE of large burned area <sup>†</sup> (log(area); winter-spring) | 2.32                                          | 2.57                                                                |
| <b>Summer</b>                                                    |                                               |                                                                     |
| Number of predictor variables                                    | 57                                            | 31                                                                  |
| Accuracy (summer)                                                | 0.74                                          | 0.72                                                                |
| AUC (summer)                                                     | 0.83                                          | 0.80                                                                |
| F-1 (summer)                                                     | 0.77                                          | 0.75                                                                |
| MAE (log(area); summer)                                          | 1.17                                          | 1.20                                                                |
| RMSE (log(area); summer)                                         | 1.87                                          | 1.88                                                                |

<sup>†</sup> Large burned area here is defined as the burned area larger than 90<sup>th</sup> percentile.

35

**Table S8.** Mean scaled absolute percentage effects by control factor group for the two fire seasons calculated by decompose analysis at the large-scale domain.

|                      | <b>Weather effect</b> | <b>Fuel effect</b> | <b>Climate effect</b> | <b>Fix effect</b> | <b>Interaction effect</b> |
|----------------------|-----------------------|--------------------|-----------------------|-------------------|---------------------------|
| <b>Spring-winter</b> | 12.57                 | 21.39              | 33.23                 | 22.93             | 10.87                     |
| <b>Summer</b>        | 16.26                 | 17.29              | 35.79                 | 21.8              | 8.87                      |

40 **Table S9.** The mean variable importance metrics (%IncMSE) of each effect for the two fire seasons calculated based on grid burned area prediction

|                      | <b>Weather effect</b> | <b>Fuel effect</b> | <b>Climate effect</b> | <b>Fix effect</b> |
|----------------------|-----------------------|--------------------|-----------------------|-------------------|
| <b>Spring-winter</b> | 8.20                  | 9.04               | 12.09                 | 6.56              |
| <b>Summer</b>        | 9.12                  | 4.85               | 19.18                 | 4.59              |

45 **Table S10.** Comparison of MAE, MAE of large burned area, and standard deviation of predictions between the model with the chosen percentiles, percentile test set 1, and percentile test set 2.

| <b>Model</b>                                                     | <b>With the chosen percentiles*</b> | <b>Percentile test set 1*</b> | <b>Percentile test set 2*</b> |
|------------------------------------------------------------------|-------------------------------------|-------------------------------|-------------------------------|
| MAE (log(area); winter-spring)                                   | 1.37                                | 1.30                          | 1.29                          |
| MAE of large burned area <sup>†</sup> (log(area); winter-spring) | 1.97                                | 2.64                          | 2.81                          |
| Standard deviation of predictions (log(area); winter-spring)     | 2.42                                | 2.09                          | 2.09                          |
| MAE (log(area); summer)                                          | 1.17                                | 1.12                          | 1.11                          |

|                                                              |      |      |      |
|--------------------------------------------------------------|------|------|------|
| MAE of large burned area <sup>†</sup><br>(log(area); summer) | 2.25 | 2.42 | 2.52 |
| Standard deviation of<br>predictions (log(area); summer)     | 2.19 | 1.93 | 1.92 |

\* Model developed in this study: Use the selected percentiles of 45, 55, 65, 85, 95, and 99 and six subgroups of (39, 49), (50, 59), (60, 69), (70, 79), (80, 89), (>=90).

50 \* Set 1: Use the selected percentiles of 45, 55, 65, 75, 85, and 95 and six subgroups of (39, 49), (50, 59), (60, 69), (70, 79), (80, 89), (>=90).

\* Set 2: Use the selected percentiles of 47.5, 63, 78, and 93 and four subgroups of (39, 55), (56, 70), (71, 85), (86, 100).

<sup>†</sup> Large burned area here is defined as the burned area larger than 90<sup>th</sup> percentile.

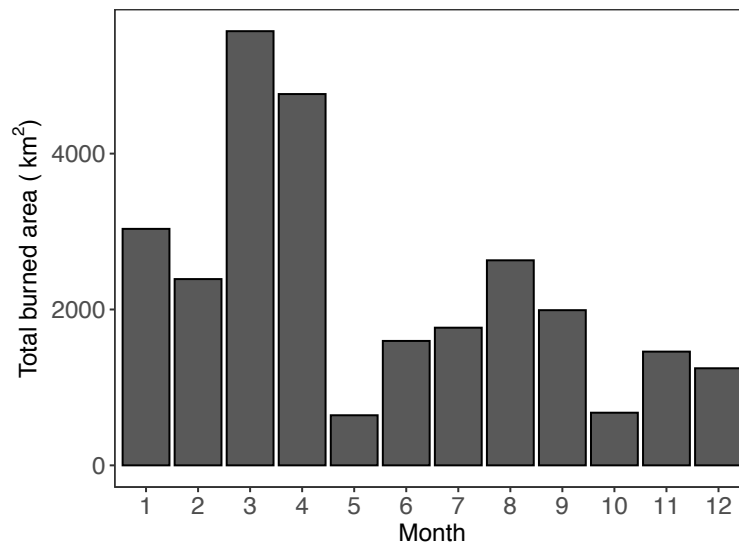

55 **Figure S1.** Seasonal burned area for the South Central US. It shows the monthly total burned area summed over 2002-2015.

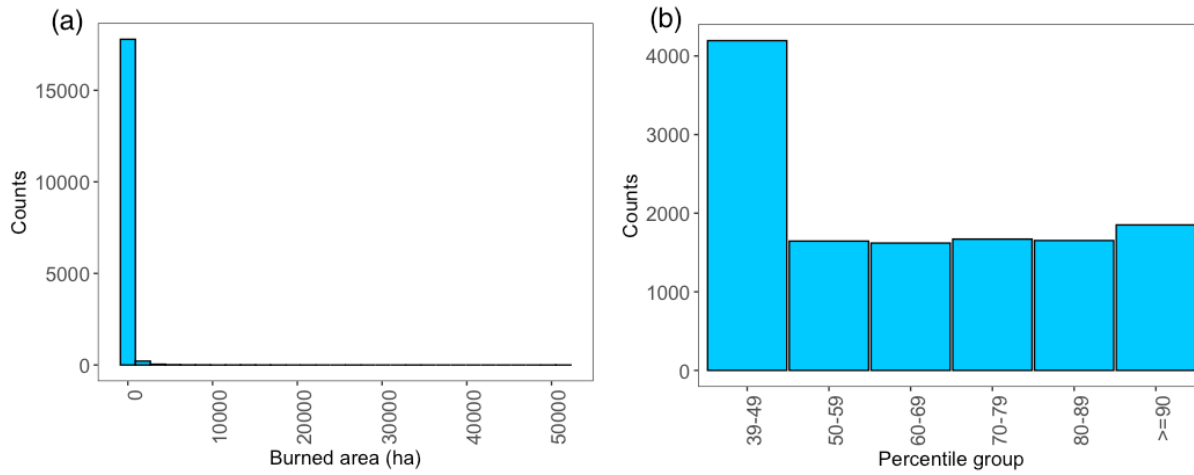

**Figure S2.** (a) Histogram of burned area of all the grids and (b) histogram of the percentile groups of burned area for the winter-spring fire season.

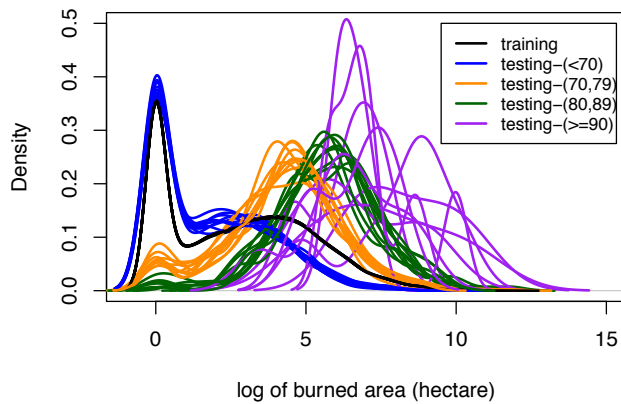

60

**Figure S3.** Probability distribution of burned area for 10 folds of the training set (black line), testing set predicted to have percentiles less than 70 (blue), between 70 and 79 (yellow), between 80 and 89 (green), and equal to or larger than 90 (purple).



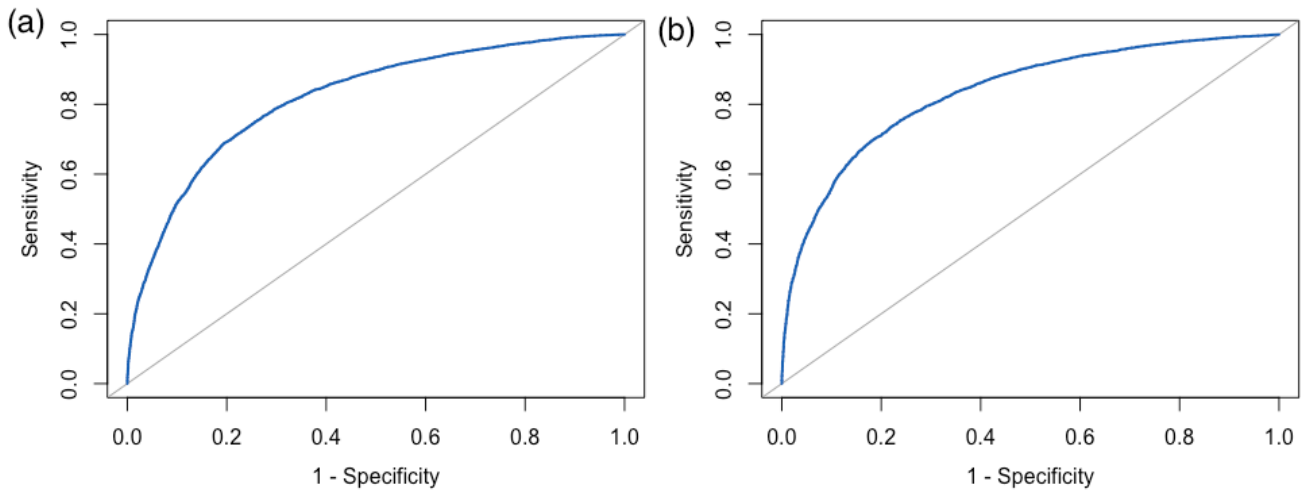

65 **Figure S4.** The ROC curve analysis of the logistic model for predicting burned grids in (a) winter-spring and (b) summer fire season.

70

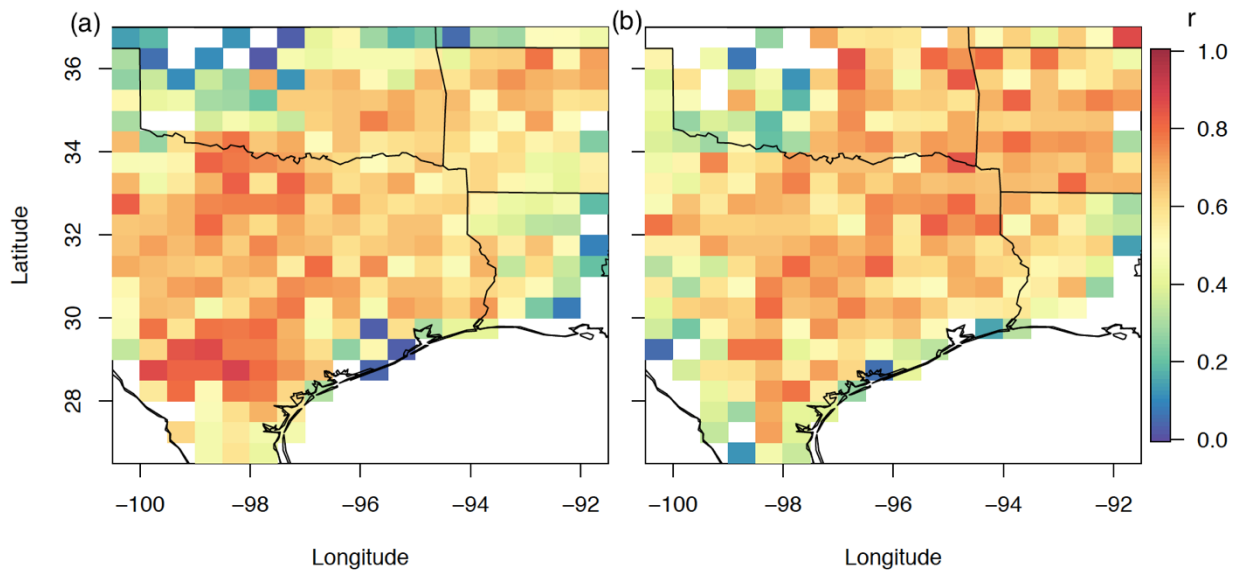

**Figure S5.** Maps of temporal correlation between observed and predicted burned area for each grid for the (a) winter-spring fire season (b) summer fire season.

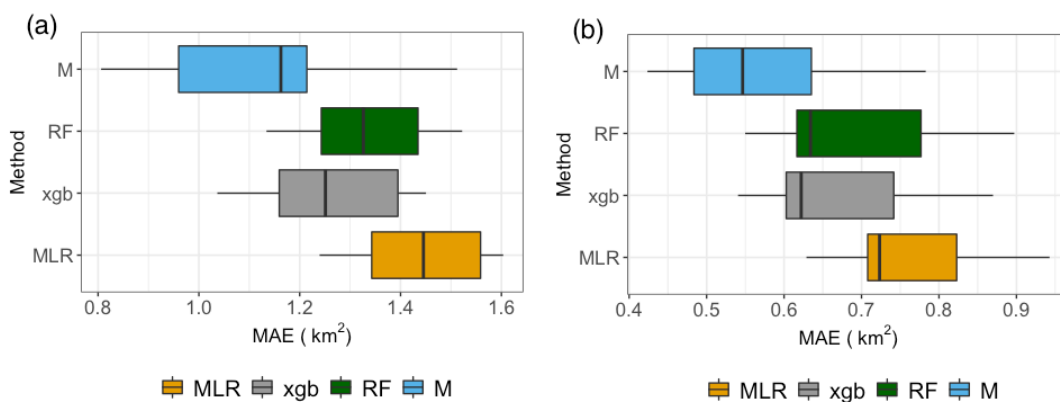

**Figure S6.** Box plots of MAE from 10-fold-cross validation and different methods for (a) winter-spring and (b) summer fire season.

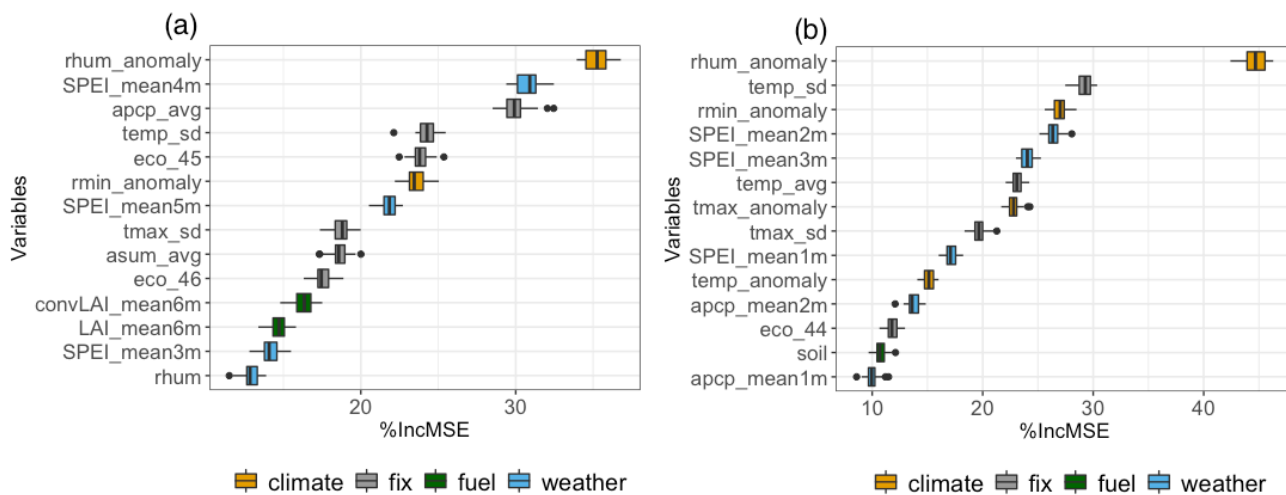

**Figure S7.** Box plots of variable importance in %IncMSE from the 50 times 10-fold cross validation for (a) winter-spring and (b) summer fire season.

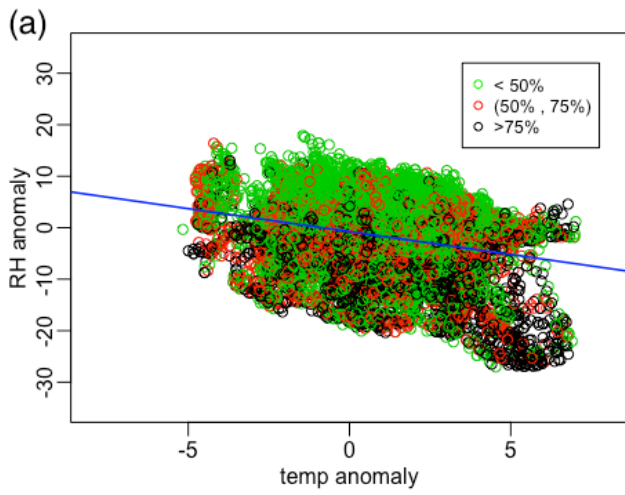

85

**Figure S8.** Scatter plot of RH anomaly versus temperature anomaly for (a) winter-spring and (b) summer fire season. The color represents different sizes of fire burned area (Green: smaller than 50th percentile; Red: larger than 50th percentile but smaller than 75th percentile; Black: larger than 75th percentile).

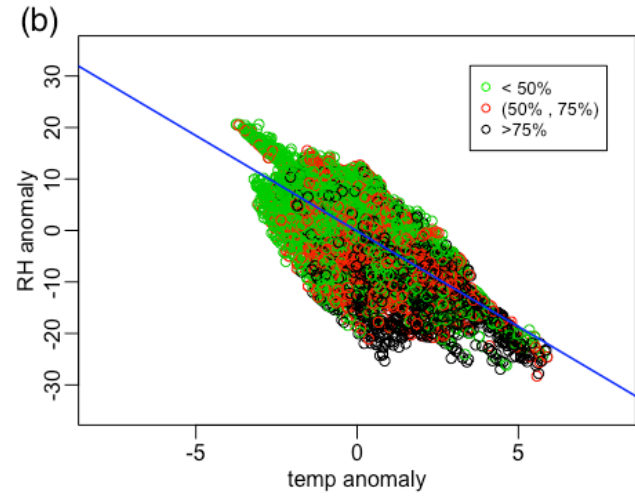

90

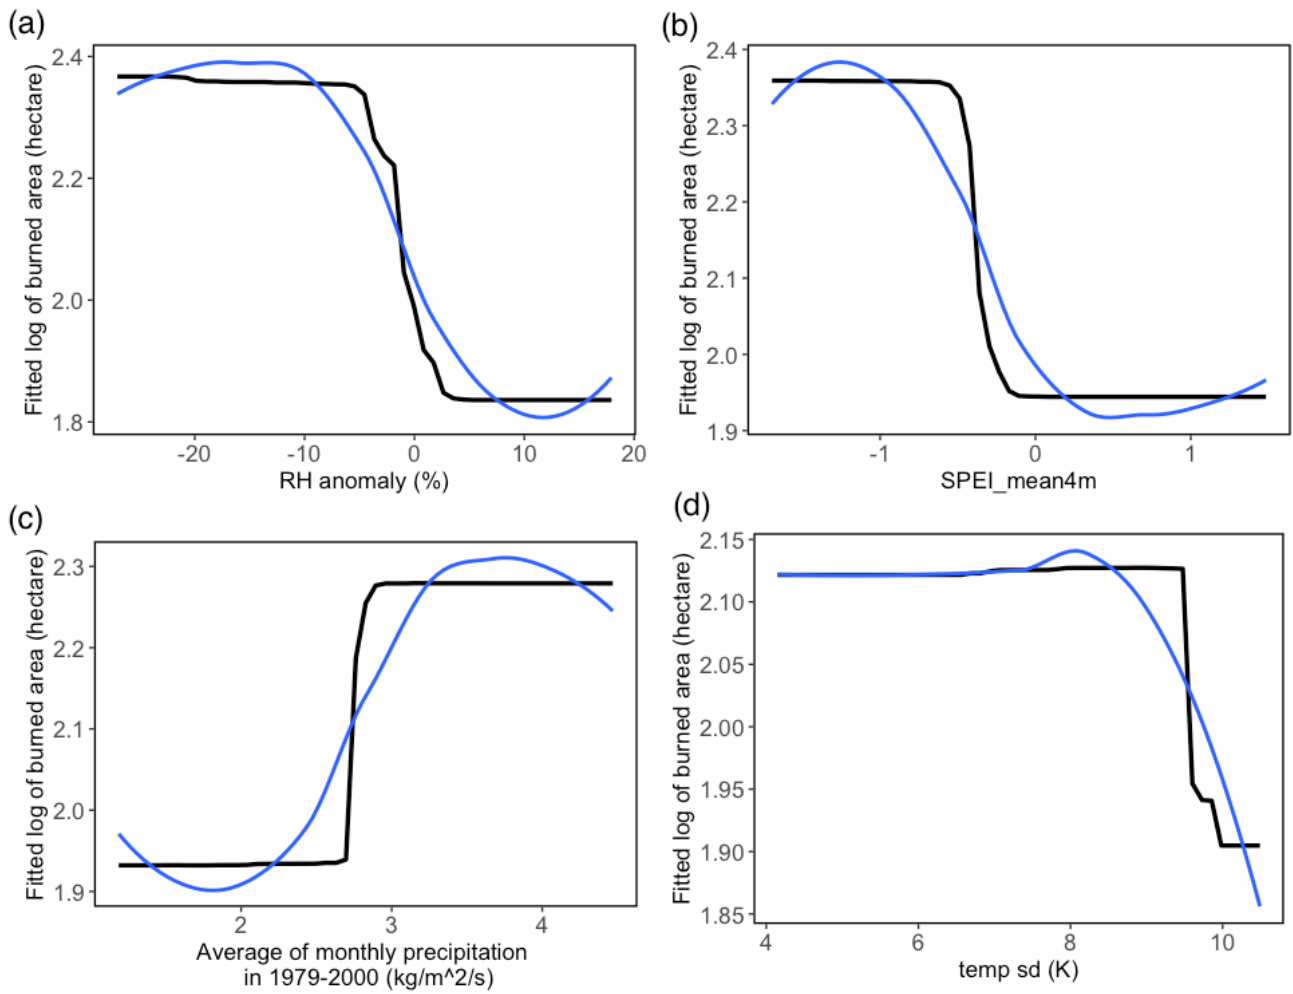

**Figure S9.** Partial dependence plots for the burned area model and (a) RH anomaly, (b) the mean SPEI of the preceding 4 months, (c) the average precipitation of 1979-2000, (d) the standard deviation of temperature of 1979-2000 for the winter-spring fire season. The blue line is the LOESS smooth line.

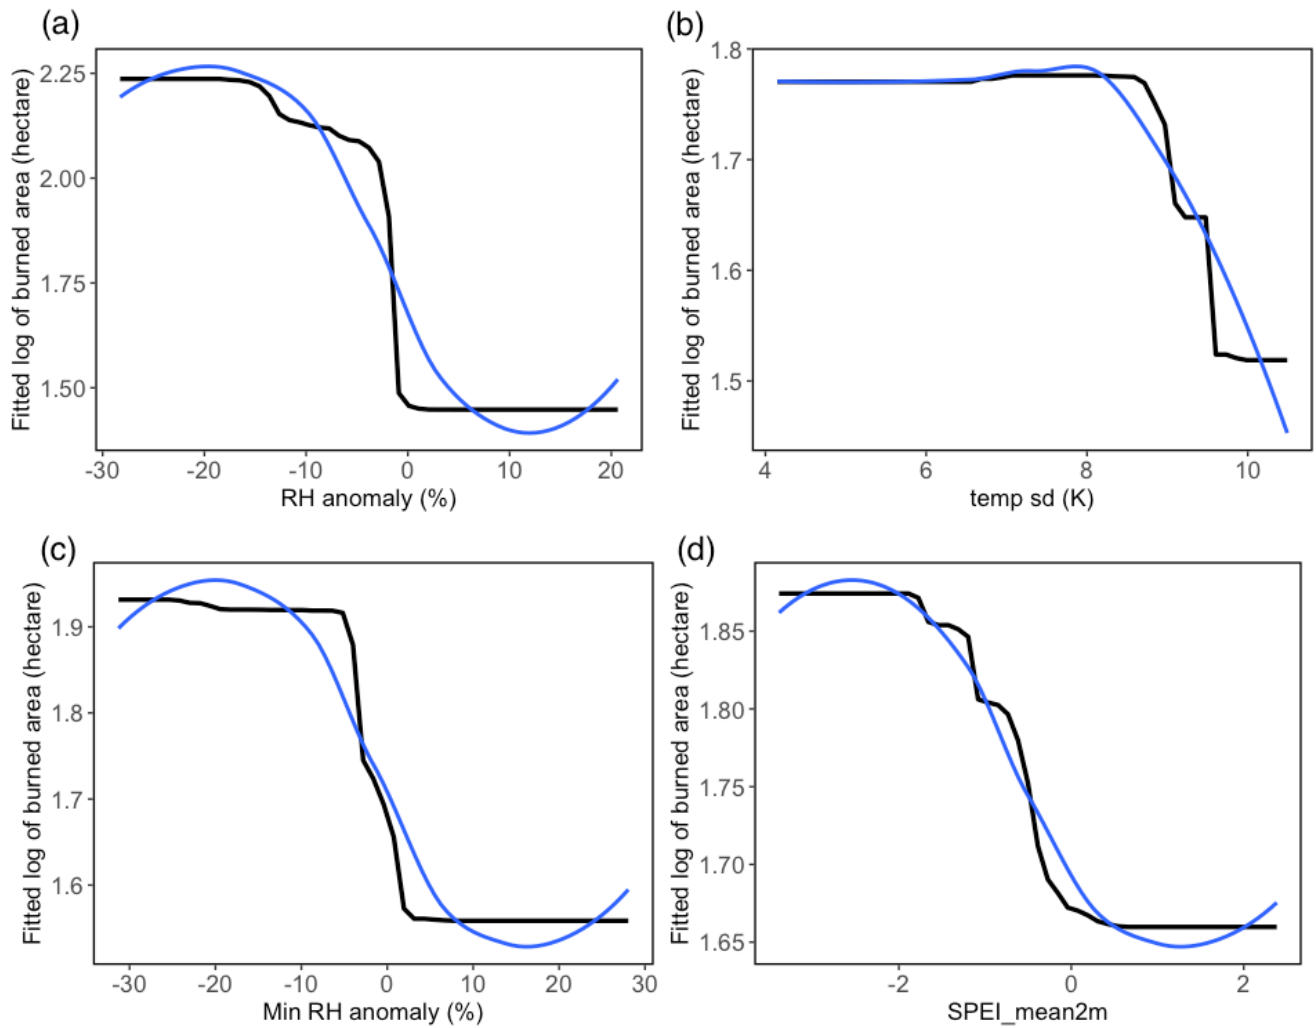

**Figure S10.** Partial dependence plots for the burned area model and (a) RH anomaly, (b) long-term (1979-2000) standard deviation of temperature, (c) minimum RH anomaly, and (d) the mean SPEI of the preceding 2 months for the summer season.

100 The blue line is the LOESS smooth line. The blue line is the LOESS smooth line.

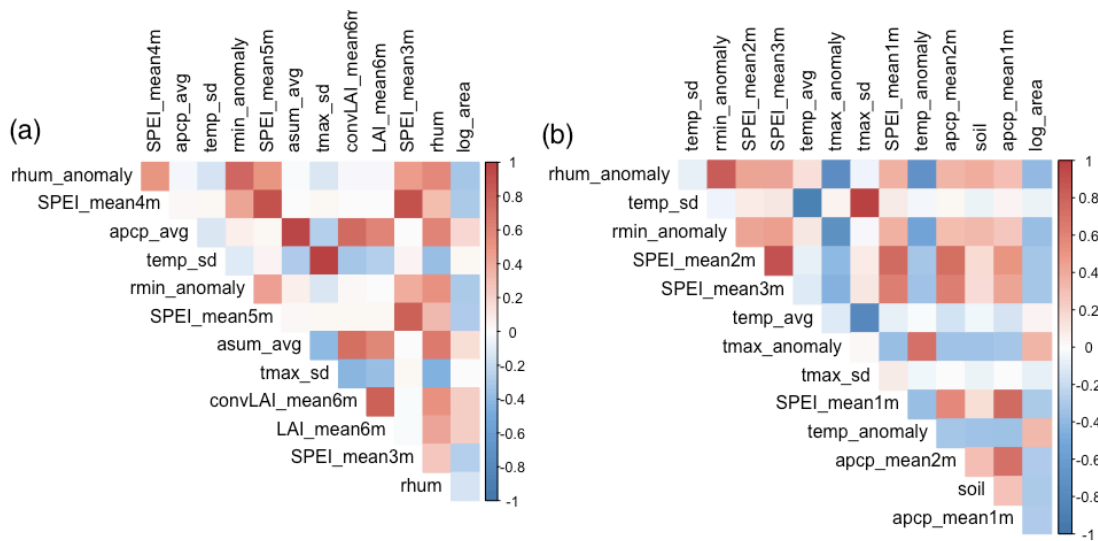

**Figure S11.** The correlation plot of the top 14 variables for the (a) winter-spring and (b) summer fire season.

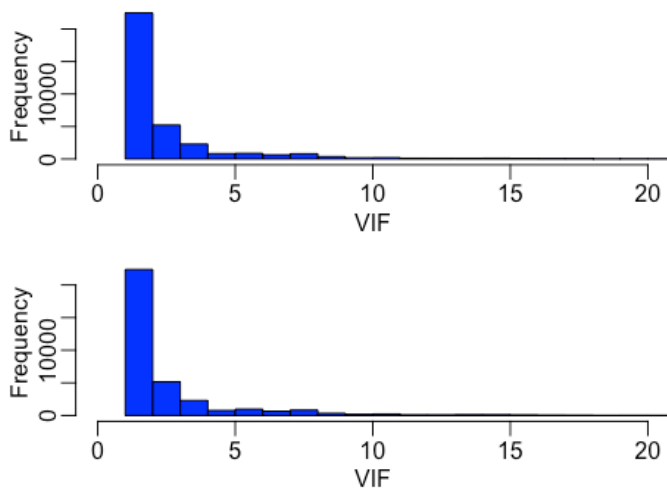

**Figure S12.** Distributions of VIF calculated based on randomly selected seven variables of 5000 times sampling for winter-spring (top) and summer fire season (bottom).

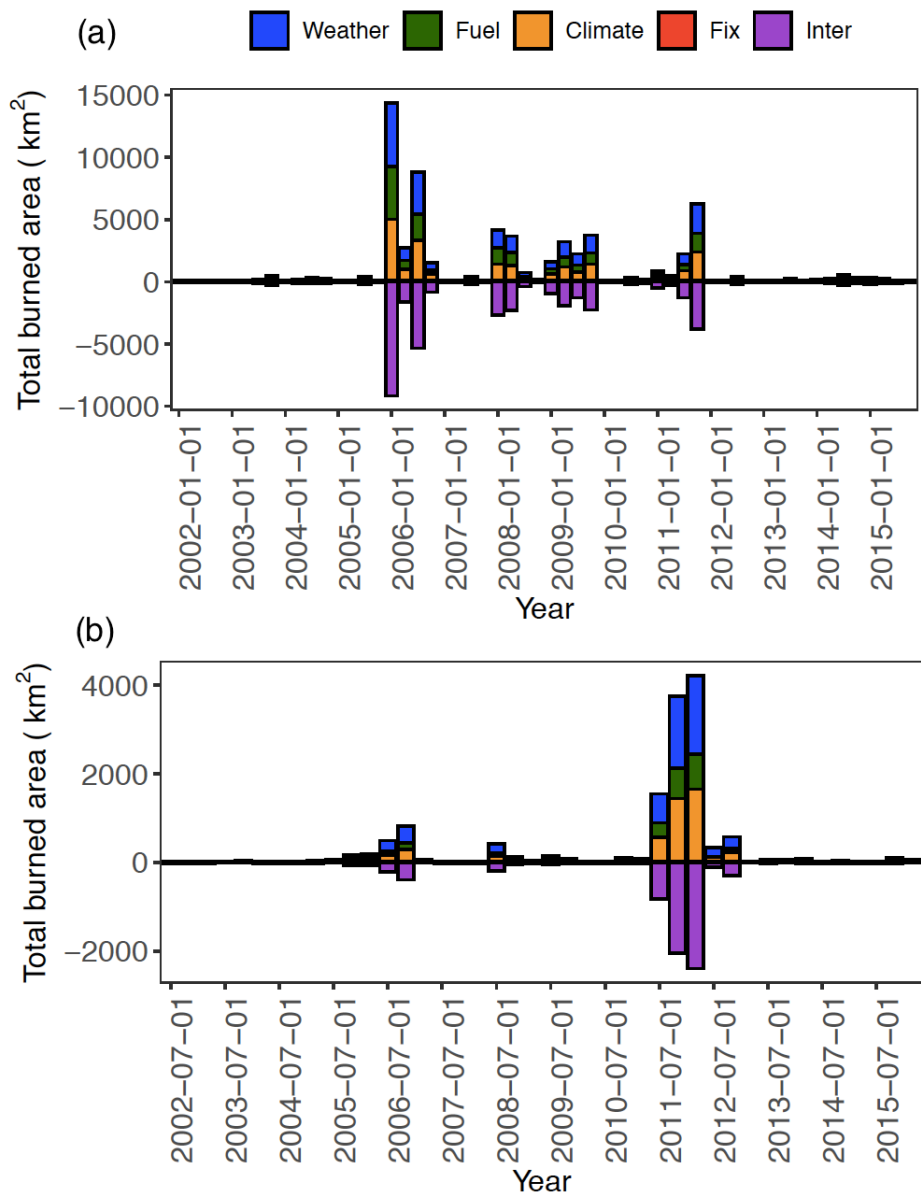

110 **Figure S13.** Timeseries of burned area contributed by different environmental controls for the (a) winter-spring and (b) summer fire season. Color of blue, green, yellow, red, and purple indicate effect of weather, fuel, climate, fix, and interaction.

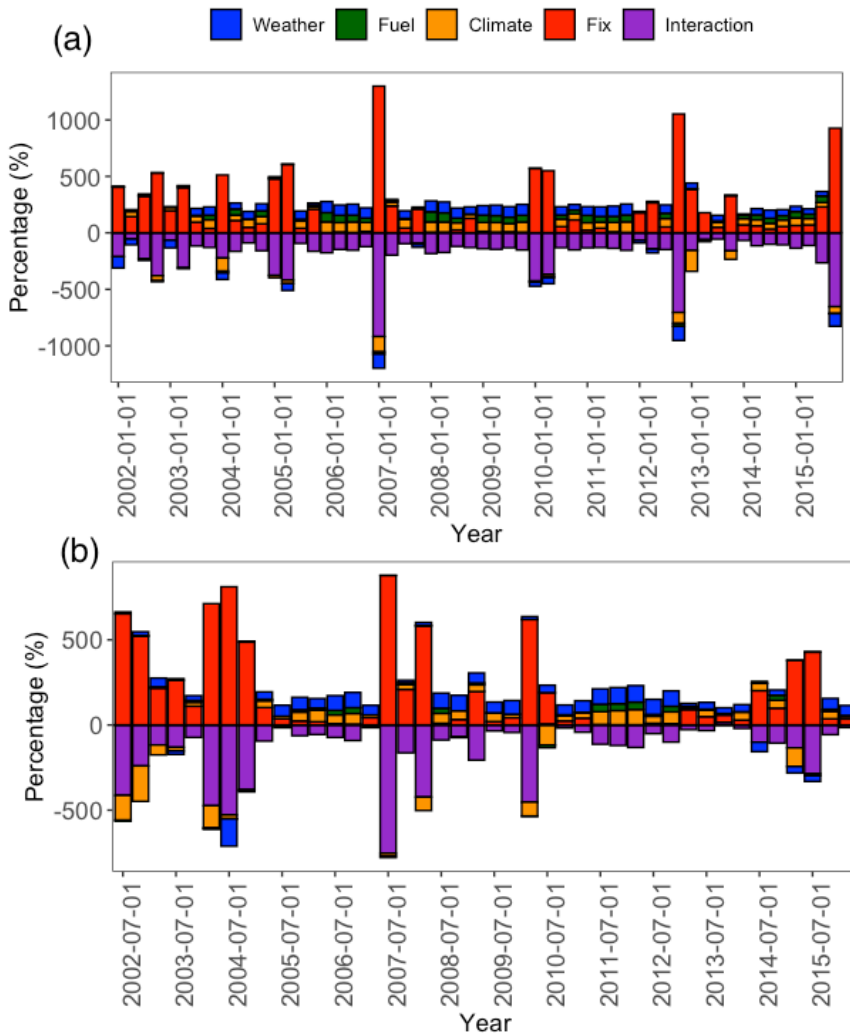

**Figure S14.** Timeseries of the percentage for the (a) winter-spring fire season and (b) summer fire season. Color of blue, green, yellow, red, and purple indicate effect of weather, fuel, climate, fix, and interaction. The percentage was calculated by dividing the total burned area of the month.



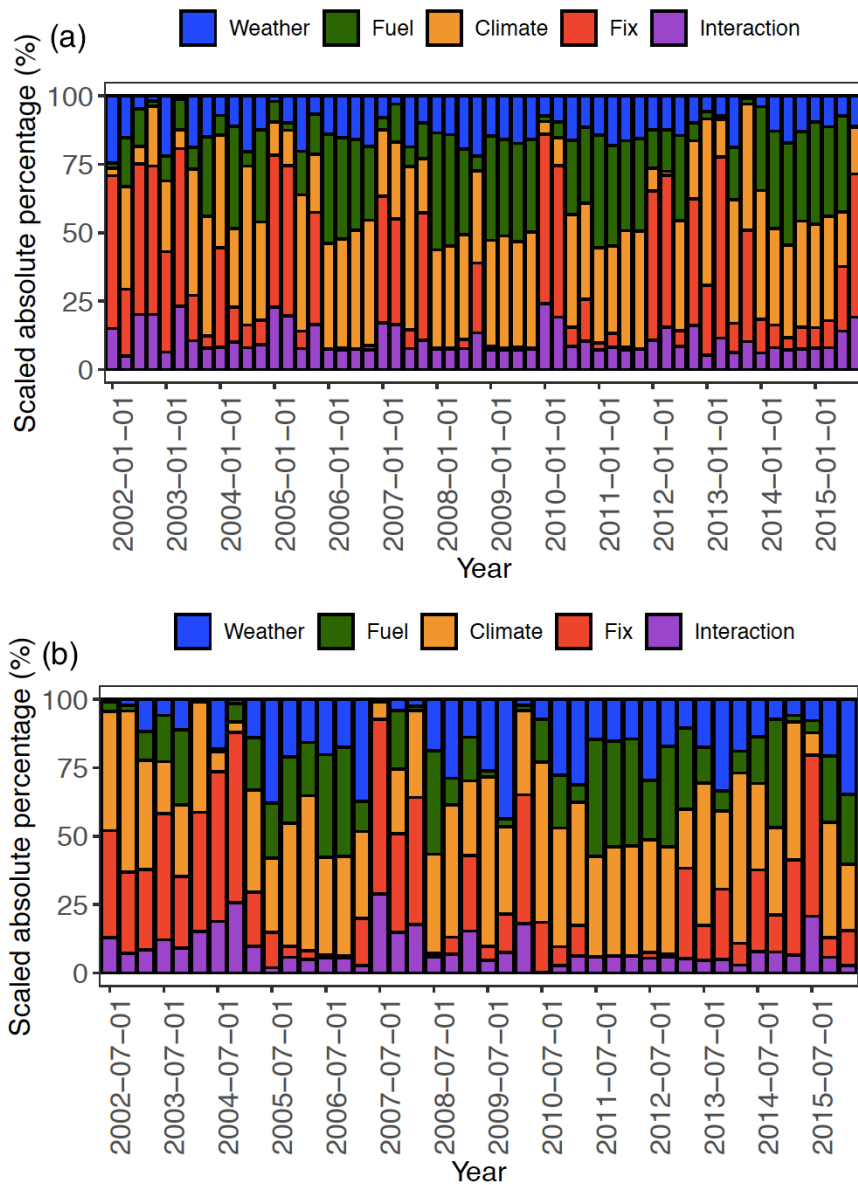

125

**Figure S15.** Timeseries of the scaled absolute percentage for the (a) winter-spring fire season and (b) summer fire season. Color of blue, green, yellow, red, and purple indicate effect of weather, fuel, climate, fix, and interaction.

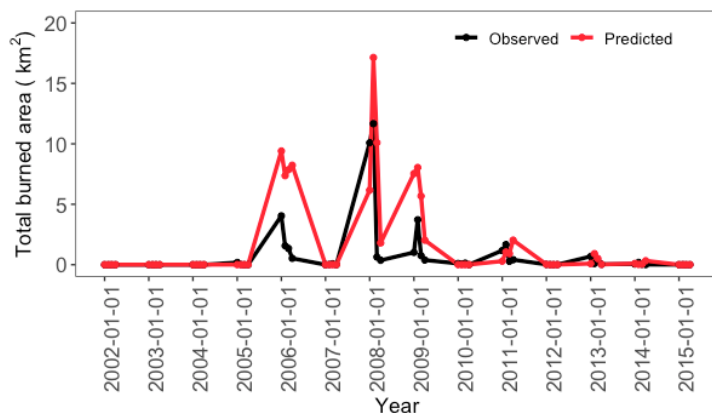

130 **Figure S16.** Timeseries of observed (black line) and predicted total burned area (red line) for the selected grid (Lon: -98.75, Lat: 29.25) for the winter-spring fire season.

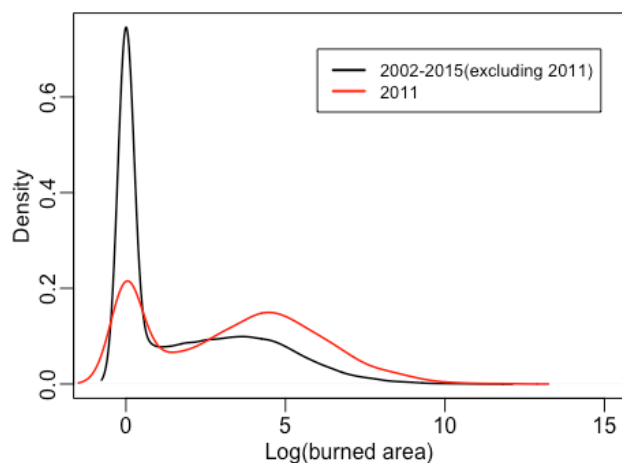

135 **Figure S17.** Distribution of burned area of all the grids for the study period excluding 2011 (black line) and of the grids for the extreme year 2011 (red line) combined both seasons.

## XGBoost Model

140 XGBoost (eXtreme Gradient Boosting) is based on Gradient Boosting Decision Tree (GBDT) method, which is an iterative decision tree algorithm. GBDT iterates multiple trees to make final decisions. Compared to GBDT, XGBoost uses a more regularized model formalization to control over-fitting and parallelizes the tree formation to enhance the computational power (Chen and Guestrin, 2016). The hyperparameters of XGboost were tuned by a grid search with 10-fold cross-validation

to find the best model based on MAE. Table S3 shows the optimum value of each hyperparameter for the winter-spring and  
145 summer fire season model.

## Calculation of skewness

Skewness is a measure of the asymmetry of the probability distribution of a random variable about its mean. The  
skewness of a random variable  $X$  is the third standardized moment  $\widetilde{\mu}_3$ , defined as:

$$150 \quad \widetilde{\mu}_3 = E \left[ \left( \frac{X-\mu}{\sigma} \right)^3 \right] = \frac{\mu_3}{\sigma^3} = \frac{E[(X-\mu)^3]}{(E[(X-\mu)^2])^{3/2}} = \frac{\kappa_3}{\kappa_2^{3/2}} \quad (1)$$

where  $\mu$  is the mean,  $\sigma$  is the standard deviation,  $E$  is the expectation operator,  $\mu_3$  is the third central moment, and  $\kappa_t$  are the  
 $t$ -th cumulants. If skewness is less than -1 or greater than +1, the distribution is highly skewed. If skewness is between -1 and  
-0.5 or between +0.5 and +1, the distribution is moderately skewed. If skewness is between -0.5 and 0.5, the distribution is  
approximately symmetric. The positive value indicates that the tail is on the right side of the distribution while negative  
155 value indicates that the tail is on the left.

## Calculation of correlation coefficient (r)

We also calculated two types of correlation coefficient ( $r$ ) to evaluate model performance: spatial  $r$  and temporal  $r$ .  
For the spatial  $r$ , for each month, we calculated the correlation coefficient of the prediction and observation for all the grids  
160 over the whole domain. As for the temporal  $r$ , for each grid, we calculated the correlation coefficient for the timeseries of  
observed and predicted burned area. At the end, we obtain a map showing the temporal  $R$ , demonstrated in Figure S5.

## Method to decompose the relative influence of environmental controls

A set of sensitivity experiments was designed to decompose the effect of different environmental controls across our  
165 study domain by perturbing variables belonging to one category at a time. The environmental control categories to be perturbed  
include weather, climate, and fuel. The fix-geospatial factors remain unchanged in each sensitivity experiment. The variables  
of each category are listed in Table 1. First, to examine the influence of weather, for each grid, we assigned the values of  
individual weather variables to their 15-year means by grids while keeping the variation of other variables (hereafter refer to  
as the “weather-avg run”). The same procedure was applied to the variables in the climate and fuel category, resulting in the  
170 climate-avg run and fuel-avg run respectively. The original model with all the variables of each grid varying by time is called  
the full-model run. Second, the gridded burned area predicted from each run is summed over all the grids across the study  
domain. The differences in resulting total burned area between the full-model run and weather-avg run represent the impact of  
weather control (hereafter called “weather effect”), and the same procedure was applied to derive the climate effect and fuel  
effect on the burned area. We also conducted the fixed run, in which for each grid, its weather, climate anomaly, and fuel  
175 variables are all fixed to their long-term mean, and the predicted burned area from this run represents the influence of geospatial

variables and climate normals on the burned area (hereafter named “fix effect”). Although the calculations of deriving the effect of a given environmental category are made by assuming linearity, the machine-learning-based prediction model does not assume linearity. Thus, the summation of burned area prediction from the weather, climate, fuel, and fixed run is not necessarily equal to the burned area predicted by the full model. This difference is considered as the interaction effect among these environmental controls.

After deriving the effects of the environmental controls on the burned area, we then calculated such effects of environmental controls in the scaled absolute percentage. The effect of an environmental control category was normalized by the number of variables in that category because the numbers of variables are different by environmental control and the category with a larger number of variables may have a larger effect on the burned area. Then, the scaled absolute percentage is defined as the normalized absolute value of the effect of one environmental control divided by the summation of the normalized absolute values of all the effects over all the categories. Thus, the scaled absolute percentage represents the average effect of a single variable in each category. For example, Equation (1) shows how we calculated the scaled absolute percentage of the weather contribution on burned area:

$$\frac{|E_w|/N_w}{|E_w|/N_w + |E_{fu}|/N_{fu} + |E_c|/N_c + |E_{fi}|/N_{fi} + |E_i|/N_t}, \quad (2)$$

, where  $E$  is the influence of the environmental controls in burned area,  $N$  indicates the number of variables in the category,  $N_t$  is the total number of variables, and the subscript  $w$ ,  $fu$ ,  $c$ ,  $fi$ , and  $i$  represent weather, fuel, climate, fixed, and interaction, respectively.
